# Supplementary material
Source: publisher site journal article supplement (http://edge.sagepub.com/sites/default/files/Venkataraman%20Chapter%20Outline%2009%20Supplement.docx)
Supplement: Supplementary file 1 [file Venkataraman%20Chapter%20Outline%2009%20Supplement.docx]

Chapter Outline

# Chapter 9 Supplement: Tools for Analyzing Designing, and Selecting Processes and Layouts

***See pages: 326-256.***

Operations Profile: Relieving Congestion at St. Francis Hospital

Process Selection, Design, and Analysis Tools

Tools for Process Selection

Tools for Process Analysis and Design

Assembly Drawings and Charts and Route Sheets

Value Stream Maps and Process Simulations

Tools for Analyzing Service Processes

Layout Analysis Tools and Techniques

Techniques for Designing Process Layouts

Technique for Designing Product Layouts: Line Balancing

Computer Software for Designing Process Layouts

Supplement Summary

Key Terms

Discussion and Review Questions

Solved Problems

Problems

Critical Thinking Exercises
